# Supplementary material for: Multifaceted Assessment of Porous Silica Nanocomposites: Unraveling Physical, Structural, and Biological Transformations Induced by Microwave Field Modification
Source: MDPI journal article supplement (doi:10.3390/nano14040337), 2024-02-08
Supplement: s1 [file s1]

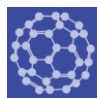

# Supplementary data

## Multifaceted Assessment of Porous Silica Nanocomposites: Unraveling Physical, Structural, and Biological Transformations Induced by Microwave Field Modification

Aleksandra Strach<sup>1</sup>, Mateusz Dulski<sup>2</sup>, Daniel Wasilkowski<sup>3</sup>, Krzysztof Matus<sup>4</sup>, Karolina Dudek<sup>5</sup>, Jacek Podwórny<sup>5</sup>, Patrycja Rawicka<sup>6</sup>, Vladlens Grebnevs<sup>7,8</sup>, Natalia Waloszczyk<sup>8</sup>, Anna Nowak<sup>3</sup>, P. Poloczek<sup>2</sup> and Sylwia Golba<sup>2</sup>

1. Doctoral School, University of Silesia, Bankowa 14, 40-032 Katowice, Poland; aleksandra.strach@us.edu.pl
2. Institute of Materials Engineering, University of Silesia, 75 Pulku Piechoty 1A, 41-500 Chorzow, Poland; mateusz.dulski@us.edu.pl; poloczekpaulina@gmail.com; sylwia.golba@us.edu.pl
3. Institute of Biology, Biotechnology, and Environmental Protection, Faculty of Natural Sciences, University of Silesia, Jagiellonska 28, 40-032 Katowice, Poland; daniel.wasilkowski@us.edu.pl; anna.m.nowak@us.edu.pl
4. Materials Research Laboratory, Silesian University of Technology, Konarskiego 18A, 44-100 Gliwice, Poland; krzysztof.matus@polsl.pl
5. Łukasiewicz Research Network, Institute of Ceramics and Building Materials, Cementowa 8, 31-938 Cracow, Poland; karolina.dudek@icimb.lukasiewicz.gov.pl; jacek.podworny@icimb.lukasiewicz.gov.pl
6. A. Chełkowski Institute of Physics, University of Silesia, 75 Pulku Piechoty 1, 41-500 Chorzow, Poland; patrycja.rawicka@us.edu.pl
7. Faculty of Chemistry, University of Latvia, Jelgavas Street 1, LV-1004 Riga, Latvia, vladlens.grebnevs@polsl.pl
8. Faculty of Chemistry, Silesian University of Technology, B. Krzywoustego Street 6, 44-100 Gliwice, Poland; natalia.szulc@polsl.pl

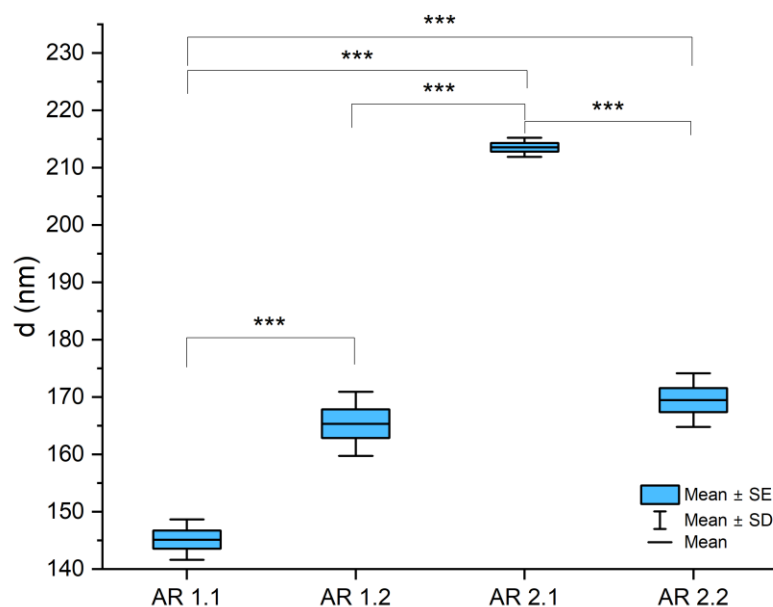

**Fig. S1.** Hydrodynamic averaged diameter ( $d_H$ ) of silver-silica nanocomposites with individually microwave-treated silicas with statistically significant differences (\* $p < 0.05$ ; \*\* $p < 0.01$ ; \*\*\* $p < 0.001$ ). Data showed directly after sonication ( $t = 0$  day).

**Table S1.** Values of diameter, polydispersity coefficient, and standard deviation were obtained for the tested samples at different sonication times.

| Sonication time<br>(min) | AR 1.1                   |                          | AR 1.2                   |                          | AR 2.1                   |                          | AR 2.2                   |                          |
|--------------------------|--------------------------|--------------------------|--------------------------|--------------------------|--------------------------|--------------------------|--------------------------|--------------------------|
|                          | $d \pm \Delta d$<br>(nm) | $PDI \pm \Delta PDI$ (-) | $d \pm \Delta d$<br>(nm) | $PDI \pm \Delta PDI$ (-) | $d \pm \Delta d$<br>(nm) | $PDI \pm \Delta PDI$ (-) | $d \pm \Delta d$<br>(nm) | $PDI \pm \Delta PDI$ (-) |
| 5                        | $631 \pm 14$             | $0.68 \pm 0.10$          | $555 \pm 23$             | $0.65 \pm 0.05$          | $570 \pm 30$             | $0.50 \pm 0.07$          | $507 \pm 16$             | $0.45 \pm 0.06$          |
| 10                       | $519 \pm 6$              | $0.56 \pm 0.05$          | $458 \pm 14$             | $0.44 \pm 0.03$          | $481 \pm 20$             | $0.43 \pm 0.03$          | $475 \pm 15$             | $0.42 \pm 0.01$          |
| 15                       | $430 \pm 5$              | $0.42 \pm 0.01$          | $401 \pm 6$              | $0.40 \pm 0.01$          | $460 \pm 20$             | $0.43 \pm 0.02$          | $467 \pm 15$             | $0.49 \pm 0.07$          |
| 20                       | $426 \pm 14$             | $0.50 \pm 0.08$          | $376 \pm 14$             | $0.39 \pm 0.03$          | $444 \pm 6$              | $0.47 \pm 0.07$          | $387 \pm 10$             | $0.39 \pm 0.02$          |
| 25                       | $360 \pm 9$              | $0.40 \pm 0.03$          | $365 \pm 7$              | $0.38 \pm 0.01$          | $358 \pm 13$             | $0.40 \pm 0.03$          | $392 \pm 7$              | $0.43 \pm 0.05$          |

**Table S2.** Physicochemical properties of Ag-SiO<sub>2</sub> nanocomposites.  $d_H$  - hydrodynamic diameter, PDI - polydispersity index, and  $z$  - Zeta potential. The data are summarized with the standard deviation.

|        | $d_H$ (nm)        | PDI             | $z$ (mV)          |
|--------|-------------------|-----------------|-------------------|
| AR 1.1 | $145.14 \pm 3.53$ | $0.40 \pm 0.02$ | $-42.06 \pm 0.35$ |

---

|        |                   |                 |                   |
|--------|-------------------|-----------------|-------------------|
| AR 1.2 | $165.34 \pm 5.59$ | $0.42 \pm 0.01$ | $-47.76 \pm 0.67$ |
| AR 2.1 | $213.56 \pm 1.65$ | $0.38 \pm 0.01$ | $-47.22 \pm 0.26$ |
| AR 2.2 | $169.46 \pm 4.69$ | $0.43 \pm 0.01$ | $-48.8 \pm 0.84$  |

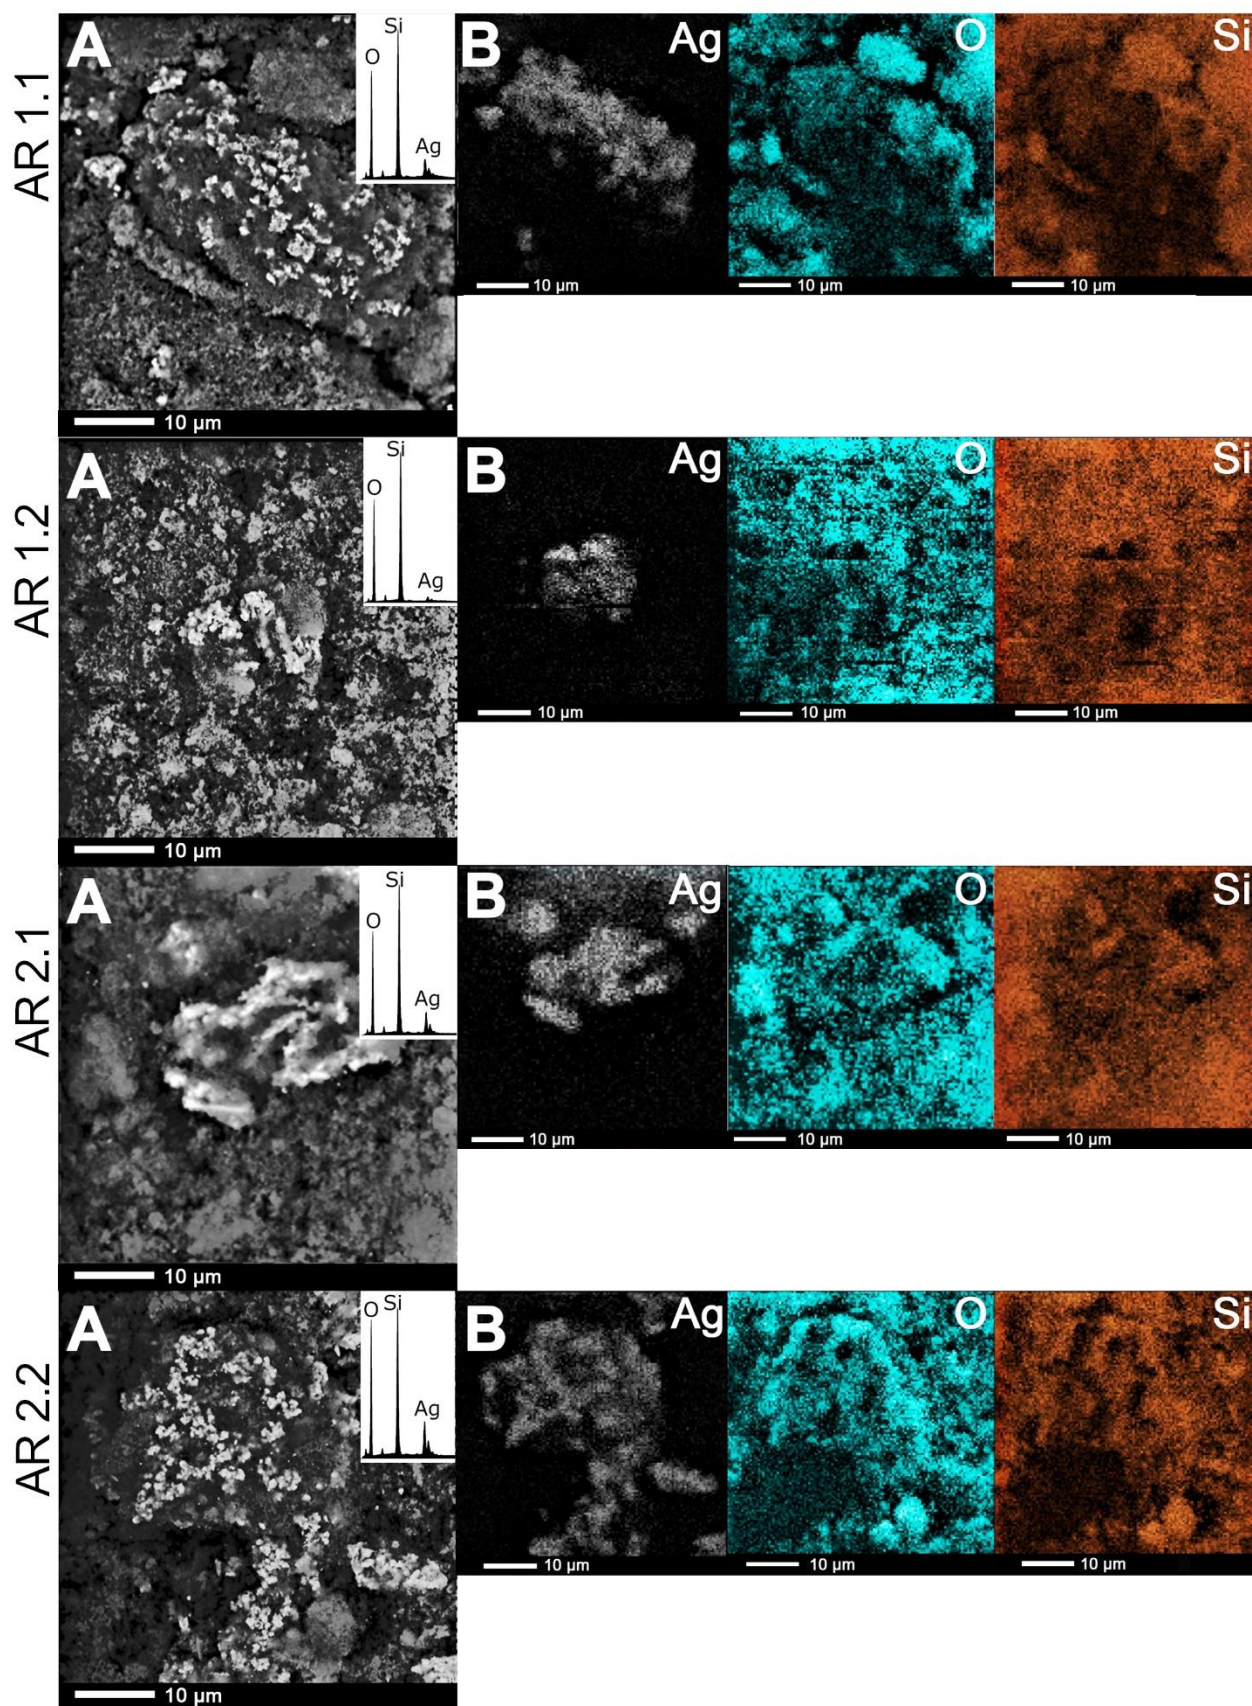

Fig. S2. SEM images with elemental distribution maps and SEM-EDS spectrum for silver-silica nanocomposites.

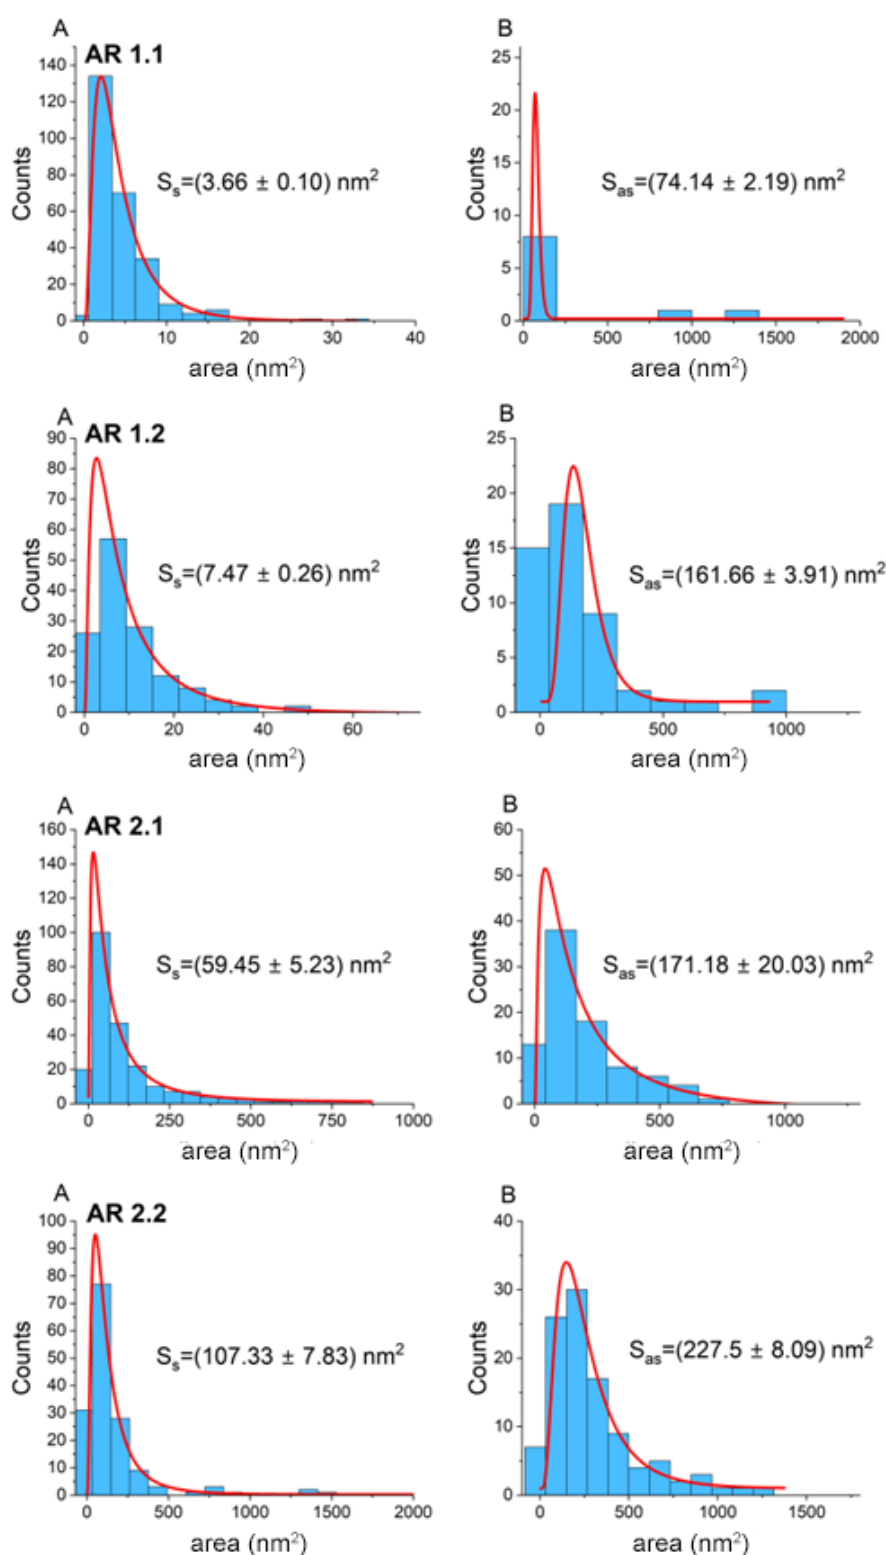

Fig. S3. The distribution of the area of spherical ( $S_s$ ) and aspherical ( $S_{as}$ ) Ag nanoparticles. The data on histograms were fitted with a logN function.
